# Supplementary material
Source: HighWire-hosted journal article supplement (http://cmajopen.ca/highwire/filestream/81067/field_highwire_adjunct_files/1/cherries.pdf)
Supplement: cherries.pdf [file cherries.pdf]

# Checklist for Reporting Results of Internet E-Surveys (CHERRIES)

**Manuscript Title:** Regional variability in fecal microbiota transplantation practices: a descriptive study of the Southern Ontario Fecal microbiota Transplantation (SOFT) Movement

**Authors:** Susy S. Hota MD MSc <sup>1,2</sup>, Salman Surangiwala BSc (C) <sup>3</sup>, Aimee S. Paterson MSc <sup>3</sup>, Bryan Coburn MD PhD <sup>2,4</sup> and Susan M. Poutanen MD MPH <sup>3,5</sup> for the Southern Ontario Fecal microbiota Transplantation Movement (SOFT Movement)

| Checkbox | Item Category                                                                        | Checklist Item                           | Location in Manuscript Text                                  |
|----------|--------------------------------------------------------------------------------------|------------------------------------------|--------------------------------------------------------------|
| X        | Design                                                                               | Describe survey design                   | Methods, page 5, paragraphs 1 and 2                          |
| X        | IRB (Institutional Review Board) and approval and informed consent process           | IRB approval                             | Methods, page 5, paragraph 3, lines 7-9                      |
|          |                                                                                      | Informed consent                         | Methods, page 5, paragraph 3, lines 5-7                      |
|          |                                                                                      | Data protection                          | Methods, page 5, paragraph 3, first sentence                 |
| X        | Development and pre-testing                                                          | Development and testing                  | Methods, page 5, paragraph 1, lines 1 and 3                  |
| X        | Recruitment process and description of the sample having access to the questionnaire | Open survey vs. closed survey            | Methods, page 5, paragraph 1, line 1-2                       |
|          |                                                                                      | Contact mode                             | Methods, page 5, paragraph 2, lines 1-4                      |
|          |                                                                                      | Advertising the survey                   | N/A (closed survey administered to defined population)       |
| X        | Survey administration                                                                | Web/email                                | Methods, page 5, paragraph 2, lines 1-3; paragraph 3, line 1 |
|          |                                                                                      | Context                                  | N/A – direct link to survey supplied to participants         |
|          |                                                                                      | Mandatory/voluntary                      | Methods, page 5, paragraph 3, line 8                         |
|          |                                                                                      | Incentives                               | Methods, page 5, paragraph 2, line 4                         |
|          |                                                                                      | Time/Date                                | Methods, page 5, paragraph 2, line 4                         |
|          |                                                                                      | Randomization of items or questionnaires | Methods, page 5, paragraph 1, lines 5-6                      |

|   |                                                      |                                                                                                           |                                                                    |
|---|------------------------------------------------------|-----------------------------------------------------------------------------------------------------------|--------------------------------------------------------------------|
|   |                                                      | Adaptive questioning                                                                                      | Methods, page 5, paragraph 1, line 1 (survey provided in Appendix) |
|   |                                                      | Number of items                                                                                           | Methods, page 5, paragraph 1, line 6                               |
|   |                                                      | Number of screens (pages)                                                                                 | Methods, page 5, paragraph 1, line 6                               |
|   |                                                      | Completeness check                                                                                        | Not electronically – manual – Methods, page 5, paragraph 3, line 3 |
|   |                                                      | Review step                                                                                               | Methods, page 5, paragraph 2, lines 5-6                            |
| X | Response rates                                       | Unique site visitor                                                                                       | N/A – closed survey to defined population, 100% response           |
|   |                                                      | View rate (ratio of unique survey visitors/unique site visitors)                                          | N/A - closed survey to defined population, 100% response           |
|   |                                                      | Participation rate (ratio of unique visitors who agreed to participate/ unique first survey page visitor) | N/A - closed survey to defined population, 100% response           |
|   |                                                      | Completion rate (ratio of users who finished the survey/users who agreed to participate)                  | Results, page 6, paragraph 1, line 1-4                             |
| X | Preventing multiple entries from the same individual | Cookies used                                                                                              | Methods, page 5, paragraph 3, lines 2-3                            |
|   |                                                      | IP check                                                                                                  |                                                                    |
|   |                                                      | Log file analysis                                                                                         |                                                                    |
|   |                                                      | Registration                                                                                              |                                                                    |
| X | Analysis                                             | Handling of incomplete questionnaires                                                                     | Methods, page 5, paragraph 3, lines 3-4                            |
|   |                                                      | Questionnaires submitted with an atypical timestamp                                                       | N/A – not timestamped                                              |
|   |                                                      | Statistical correction                                                                                    | Methods, page 5, paragraph 3, line 5                               |
